# Supplementary material
Source: publisher site journal article supplement (https://www.dovepress.com/article/395777)
Supplement: Supplementary file 1 [file get_supplementary_file.php]

**GERD questionnaire**

Please recall the frequency of the following symptoms over the past 7 days

*1.How often did you have a burning feeling behind your breastbone (heartburn)?*

□ 0 days/week □ 1 day/week □ 2-3 days/week □ 4-7 days/week

*2. How often did you have stomach contents (liquid or food) moving upwards to your throat or mouth (regurgitation)?*

□ 0 days/week □ 1 day/week □ 2-3 days/week □ 4-7 days/week

*3. How often did you have pain in the center of the upper stomach?*

□ 0 days/week □ 1 day/week □ 2-3 days/week □ 4-7 days/week

*4. How often did you feel nausea?*

□ 0 days/week □ 1 day/week □ 2-3 days/week □ 4-7 days/week

*5. How often did you have difficulty getting a good night's sleep because of your heartburn and/or regurgitation?*

□ 0 days/week □ 1 day/week □ 2-3 days/week □ 4-7 days/week

*6. How often did you take additional medication for your heartburn and/or regurgitation, other than what the physician told you to take) (such as Tums, Rolaids, Maalox?)*

□ 0 days/week □ 1 day/week □ 2-3 days/week □ 4-7 days/week

Adapted from Jonasson C, Wernersson B, Hoff DA, Hatlebakk JG. Validation of the GerdQ questionnaire for the diagnosis of gastro-oesophageal reflux disease. *Aliment Pharmacol Ther*. 2013;37(5):564–572. © 2013 Blackwell Publishing Ltd.17
